# Supplementary material
Source: publisher site journal article supplement (https://www.dovepress.com/article/108828)
Supplement: Supplementary file 1 [file get_supplementary_file.php]

**Supplemental Tables:**

**Supplemental Table 1** GO functional annotation of biological process for miR-198 target

genes

| <b>GO ID</b> | <b>GO term</b>                                                   | <b>Count (%)</b> | <b>P value</b> | <b>Gene symbol</b>                                           |
|--------------|------------------------------------------------------------------|------------------|----------------|--------------------------------------------------------------|
| GO:0007167   | enzyme linked receptor protein signaling pathway                 | 20(1.3)          | 1.82E-10       | MTSS1, MPZL1, FUT8, NLK, CBL, MET, SMAD2, PTEN, SRC, etc.    |
| GO:0007169   | transmembrane receptor protein tyrosine kinase signaling pathway | 15(1.0)          | 1.23E-08       | MTSS1, MPZL1, CBL, MET, PTEN, SRC, NTRK3, DDR1, CTGF, etc.   |
| GO:0006928   | cell motion                                                      | 20(1.3)          | 4.06E-08       | PVR, MTSS1, TLN1, FUT8, FOXJ1, MET, ZEB2, PTEN, SRC, etc.    |
| GO:0016477   | cell migration                                                   | 14(0.9)          | 1.10E-06       | PVR, FUT8, FOXJ1, MET, ZEB2, PTEN, SRC, ULK1, ITGA5, etc.    |
| GO:0042127   | regulation of cell proliferation                                 | 23(1.5)          | 1.59E-06       | CTBP2, FOXJ1, CSF1, TNFRSF8, CDK6, SMAD2, BCL2L1, CDK4, etc. |
| GO:0051674   | localization of cell                                             | 14(0.9)          | 3.59E-06       | PVR, FUT8, FOXJ1, MET, ZEB2, PTEN, SRC, ULK1, ITGA5, etc.    |
| GO:0048870   | cell motility                                                    | 14(0.9)          | 3.59E-06       | PVR, FUT8, FOXJ1, MET, ZEB2, PTEN, SRC, ULK1, ITGA5, etc.    |
| GO:0042325   | regulation of phosphorylation                                    | 17(1.1)          | 3.90E-06       | CSF1, MET, ZEB2, PTEN, SPDYA, PPP1R9B, SPRY2, YWHAG, etc.    |
| GO:0051174   | regulation of phosphorus metabolic process                       | 17(1.1)          | 6.48E-06       | CSF1, MET, ZEB2, PTEN, SPDYA, PPP1R9B, SPRY2, YWHAG, etc.    |
| GO:0019220   | regulation of phosphate metabolic process                        | 17(1.1)          | 6.48E-06       | CSF1, MET, ZEB2, PTEN, SPDYA, PPP1R9B, SPRY2, YWHAG, etc.    |
| GO:0006468   | protein amino acid                                               | 20(1.3)          | 6.91E-06       | NLK, MET, STK17B, CDK6, SMAD2,                               |

|            |                                                  |         |          |                                                              |
|------------|--------------------------------------------------|---------|----------|--------------------------------------------------------------|
|            | phosphorylation                                  |         |          | CDK4, SRC, PAK6, NTRK3, etc.                                 |
| GO:0045859 | regulation of protein kinase activity            | 14(0.9) | 1.26E-05 | SPDYA, SPRY2, YWHAG, CDKN2B, CCND2, CSF1, MET, CD4, etc.     |
| GO:0006793 | phosphorus metabolic process                     | 24(1.5) | 1.46E-05 | INPPL1, NLK, MET, STK17B, CDK6, SMAD2, CDK4, PTEN, etc.      |
| GO:0006796 | phosphate metabolic process                      | 24(1.5) | 1.46E-05 | INPPL1, NLK, MET, STK17B, CDK6, SMAD2, CDK4, PTEN, SRC, etc. |
| GO:0043549 | regulation of kinase activity                    | 14(0.9) | 1.82E-05 | SPDYA, SPRY2, YWHAG, CDKN2B, CCND2, CSF1, MET, CD4, etc.     |
| GO:0051338 | regulation of transferase activity               | 14(0.9) | 2.80E-05 | SPDYA, SPRY2, YWHAG, CDKN2B, CCND2, CSF1, MET, CD4, etc.     |
| GO:0010033 | response to organic substance                    | 19(1.2) | 7.07E-05 | PPARA, SMAD2, BCL2L1, PTEN, SRC, DDR1, HDAC4, CDKN2B, etc.   |
| GO:0016310 | phosphorylation                                  | 20(1.3) | 8.49E-05 | NLK, MET, STK17B, CDK6, SMAD2, CDK4, SRC, PAK6, NTRK3, etc.  |
| GO:0001952 | regulation of cell-matrix adhesion               | 5(0.3)  | 9.11E-05 | DDR1, CSF1, CDK6, THBS1, PTEN                                |
| GO:0008285 | negative regulation of cell proliferation        | 13(0.8) | 9.32E-05 | DDR1, HDAC4, CTBP2, CDKN2B, BTG2, FOXJ1, TNFRSF8, etc.       |
| GO:0032268 | regulation of cellular protein metabolic process | 14(0.9) | 3.18E-04 | CSF1, ZEB2, CDK4, HDAC4, PPP1R9B, CCND2, SERPINA5, etc.      |
| GO:0051329 | interphase of mitotic cell cycle                 | 7(0.4)  | 3.19E-04 | SPDYA, CDKN2B, CCND2, POLD1, CDK6, BIRC5, CDK4               |
| GO:0051325 | interphase                                       | 7(0.4)  | 3.72E-04 | SPDYA, CDKN2B, CCND2, POLD1, CDK6, BIRC5, CDK4               |
| GO:0010810 | regulation of cell-substrate adhesion            | 5(0.3)  | 7.43E-04 | DDR1, CSF1, CDK6, THBS1, PTEN                                |
| GO:0045860 | positive regulation of protein kinase activity   | 9(0.6)  | 8.77E-04 | SPDYA, CCND2, CSF1, MET, ZEB2, CD4, EGF, THBS1, FRS2         |

|            |                                                     |         |          |                                                                    |
|------------|-----------------------------------------------------|---------|----------|--------------------------------------------------------------------|
| GO:0001932 | regulation of protein amino acid phosphorylation    | 8(0.5)  | 9.21E-04 | PPP1R9B, CCND2, ZEB2, CD4, TNK2, EGF, BMPR1A, CBS                  |
| GO:0033674 | positive regulation of kinase activity              | 9(0.6)  | 1.10E-03 | SPDYA, CCND2, CSF1, MET, ZEB2, CD4, EGF, THBS1, FRS2               |
| GO:0022403 | cell cycle phase                                    | 12(0.8) | 1.21E-03 | SPDYA, CDKN2B, CCND2, FANCD2, POLD1, CDK6, PAFAH1B1, etc.          |
| GO:0051347 | positive regulation of transferase activity         | 9(0.6)  | 1.40E-03 | SPDYA, CCND2, CSF1, MET, ZEB2, CD4, EGF, THBS1, FRS2               |
| GO:0022402 | cell cycle process                                  | 14(0.9) | 1.62E-03 | CDK6, BIRC5, CDK4, RAD52, SPDYA, PPP1R9B, CDKN2B, etc.             |
| GO:0043405 | regulation of MAP kinase activity                   | 7(0.4)  | 1.66E-03 | SPRY2, MET, ZEB2, EGF, THBS1, FRS2, CBS                            |
| GO:0042327 | positive regulation of phosphorylation              | 6(0.4)  | 1.76E-03 | CCND2, CD4, TNK2, EGF, THBS1, BMPR1A                               |
| GO:0010562 | positive regulation of phosphorus metabolic process | 6(0.4)  | 2.02E-03 | CCND2, CD4, TNK2, EGF, THBS1, BMPR1A                               |
| GO:0045937 | positive regulation of phosphate metabolic process  | 6(0.4)  | 2.02E-03 | CCND2, CD4, TNK2, EGF, THBS1, BMPR1A                               |
| GO:0051726 | regulation of cell cycle                            | 10(0.6) | 2.89E-03 | SPDYA, PPP1R9B, CDKN2B, CCND2, CDK6, BIRC5, H2AFX, EGF, CDK4, PTEN |
| GO:0035295 | tube development                                    | 8(0.5)  | 3.61E-03 | SPRY2, SP1, CTGF, HOXB13, ZEB2, SMAD2, EGF, BMPR1A                 |
| GO:0007155 | cell adhesion                                       | 15(1.0) | 3.88E-03 | PVR, MTSS1, TLN2, INPPL1, PCDH9, SRC, DDR1, CTGF, etc.             |
| GO:0022610 | biological adhesion                                 | 15(1.0) | 3.93E-03 | PVR, MTSS1, TLN2, INPPL1, PCDH9, SRC, DDR1, CTGF, etc.             |
| GO:0008284 | positive regulation of cell proliferation           | 11(0.7) | 3.99E-03 | SPDYA, HDAC4, CCND2, CSF1, CDK6, BCL2L1, MST1R, EGF, etc.          |

|            |                                                                               |         |          |                                                                  |
|------------|-------------------------------------------------------------------------------|---------|----------|------------------------------------------------------------------|
| GO:0032270 | positive regulation of cellular protein metabolic process                     | 8(0.5)  | 4.93E-03 | HDAC4, CCND2, CSF1, CD4, TNK2, CDK4, THBS1, BMPR1A               |
| GO:0001701 | in utero embryonic development                                                | 7(0.4)  | 4.99E-03 | FUT8, SP1, APBA2, SMAD2, BCL2L1, CAPN2, MLL2                     |
| GO:0031399 | regulation of protein modification process                                    | 9(0.6)  | 4.99E-03 | HDAC4, PPP1R9B, CCND2, ZEB2, CD4, TNK2, EGF, BMPR1A, CBS         |
| GO:0017015 | regulation of transforming growth factor beta receptor signaling pathway      | 4(0.3)  | 5.05E-03 | PEG10, CDKN2B, SMAD2, THBS1                                      |
| GO:0042981 | regulation of apoptosis                                                       | 16(1.0) | 5.35E-03 | CYCS, STK17B, TNFRSF8, BIRC5, BCL2L1, ARHGEF9, PTEN, etc.        |
| GO:0009725 | response to hormone stimulus                                                  | 10(0.6) | 5.67E-03 | PPARA, BTG2, CCND2, MSI1, SORT1, BCL2L1, PTPN1, THBS1, PTEN, SRC |
| GO:0010553 | negative regulation of specific transcription from RNA polymerase II promoter | 4(0.3)  | 5.81E-03 | HDAC4, PPARA, FOXJ1, NCOR2                                       |
| GO:0043067 | regulation of programmed cell death                                           | 16(1.0) | 5.85E-03 | CYCS, STK17B, TNFRSF8, BIRC5, BCL2L1, ARHGEF9, PTEN, etc.        |
| GO:0010941 | regulation of cell death                                                      | 16(1.0) | 6.05E-03 | CYCS, STK17B, TNFRSF8, BIRC5, BCL2L1, ARHGEF9, PTEN, etc.        |
| GO:0051247 | positive regulation of protein metabolic process                              | 8(0.5)  | 6.18E-03 | HDAC4, CCND2, CSF1, CD4, TNK2, CDK4, THBS1, BMPR1A               |
| GO:0044093 | positive regulation of molecular function                                     | 13(0.8) | 6.19E-03 | SPDYA, HDAC4, VCP, CCND2, FOXJ1, CSF1, CYCS, MET, etc.           |
| GO:0019058 | viral infectious cycle                                                        | 4(0.3)  | 6.64E-03 | CTBP2, PVRL2, CD4, HMGA1                                         |
| GO:0043085 | positive regulation of catalytic activity                                     | 12(0.8) | 6.88E-03 | SPDYA, VCP, CCND2, FOXJ1, CSF1, MET, CYCS, ZEB2, CD4, EGF, etc.  |
| GO:0006915 | apoptosis                                                                     | 13(0.8) | 7.62E-03 | PEA15, PEG10, VCP, BAG3, CYCS, STK17B, TNFRSF18, BIRC5, etc.     |

|            |                                                    |         |          |                                                              |
|------------|----------------------------------------------------|---------|----------|--------------------------------------------------------------|
| GO:0030155 | regulation of cell adhesion                        | 6(0.4)  | 7.71E-03 | DDR1, CSF1, CDK6, THBS1, PTEN, SRC                           |
| GO:0009952 | anterior/posterior pattern formation               | 6(0.4)  | 8.43E-03 | HOXA1, BTG2, ZEB2, SMAD2, FRS2, BMPR1A                       |
| GO:0012501 | programmed cell death                              | 13(0.8) | 8.52E-03 | PEA15, PEG10, VCP, BAG3, CYCS, STK17B, TNFRSF18, BIRC5, etc. |
| GO:0014902 | myotube differentiation                            | 3(0.2)  | 8.77E-03 | SORT1, ADAM12, CAPN2                                         |
| GO:0032582 | negative regulation of gene-specific transcription | 4(0.3)  | 9.01E-03 | HDAC4, PPARA, FOXJ1, NCOR2                                   |

---

**Note:** GO, Gene Ontology.

**Supplemental Table 2** GO functional annotation of cellular component for miR-198 target

genes.

| GO ID      | GO term                       | Count (%) | P value  | Gene symbol                                                    |
|------------|-------------------------------|-----------|----------|----------------------------------------------------------------|
| GO:0043233 | organelle lumen               | 34(2.2)   | 5.11E-06 | POLR2E, HOXB13, DGCR8, GPSM2, CD4, H2AFX, OGT, THBS1, etc.     |
| GO:0031974 | membrane-enclosed lumen       | 34(2.2)   | 7.82E-06 | POLR2E, HOXB13, DGCR8, GPSM2, CD4, H2AFX, OGT, THBS1, etc.     |
| GO:0031981 | nuclear lumen                 | 29(1.9)   | 1.07E-05 | POLR2E, HOXB13, DGCR8, GPSM2, H2AFX, OGT, MYB, NOVA1, etc.     |
| GO:0005829 | cytosol                       | 26(1.7)   | 5.67E-05 | TLN1, INPPL1, CBL, CYCS, BIRC5, SMAD2, BCL2L1, ARHGEF9, etc.   |
| GO:0070013 | intracellular organelle lumen | 31(2.0)   | 6.56E-05 | POLR2E, HOXB13, DGCR8, GPSM2, CD4, H2AFX, OGT, MYB, etc.       |
| GO:0001726 | ruffle                        | 6(0.4)    | 2.19E-04 | MTSS1, TLN1, TLN2, ITGA5, ARHGAP1, CDK6                        |
| GO:0005886 | plasma membrane               | 49(3.1)   | 3.18E-04 | PVR, HDLBP, TLN1, MPZL1, MSR1, TLN2, CSF1, HFE, TNFRSF8, etc.  |
| GO:0005654 | nucleoplasm                   | 18(1.2)   | 8.06E-04 | CTBP2, ADARB1, POLR2E, HOXB13, SMAD2, DACH1, RAD52, CDK4, etc. |
| GO:0005901 | caveola                       | 5(0.3)    | 8.60E-04 | CBL, SLC2A1, CACNA1C, SRC, BMPR1A                              |
| GO:0031252 | cell leading edge             | 7(0.4)    | 9.53E-04 | MTSS1, TLN1, TLN2, ITGA5, ARHGAP1, CDK6, PAFAH1B1              |
| GO:0015629 | actin cytoskeleton            | 9(0.6)    | 1.66E-03 | PPP1R9B, MTSS1, TLN2, INPPL1, STK17B, SPTBN1, MST1R, BMF, TPM3 |
| GO:0000307 | cyclin-dependent protein      | 3(0.2)    | 3.50E-03 | CCND2, CDK6, CDK4                                              |

|            |                                                 |         |          |                                                                  |
|------------|-------------------------------------------------|---------|----------|------------------------------------------------------------------|
|            | kinase holoenzyme<br>complex                    |         |          |                                                                  |
| GO:0008287 | protein serine/threonine<br>phosphatase complex | 4(0.3)  | 4.27E-03 | SPDYA, PPP1R9B, CYCS, PPP2R5E                                    |
| GO:0044459 | plasma membrane part                            | 30(1.9) | 5.20E-03 | TLN1, MPZL1, MSR1, TLN2, HFE,<br>BCL2L1, SRC, CNR1, SLC2A1, etc. |
| GO:0044451 | nucleoplasm part                                | 12(0.8) | 5.81E-03 | SPDYA, HDAC4, CTBP2, POLR2E,<br>HOXB13, SMAD2, DACH1, OGT, etc.  |
| GO:0045121 | membrane raft                                   | 6(0.4)  | 6.45E-03 | CBL, SLC2A1, CD4, CACNA1C, SRC,<br>BMPR1A                        |
| GO:0005938 | cell cortex                                     | 6(0.4)  | 7.03E-03 | PPP1R9B, INPPL1, GPSM2, SPTBN1,<br>PAFAH1B1, MAPRE1              |
| GO:0030863 | cortical cytoskeleton                           | 4(0.3)  | 7.55E-03 | PPP1R9B, INPPL1, SPTBN1, MAPRE1                                  |
| GO:0005881 | cytoplasmic microtubule                         | 3(0.2)  | 9.39E-03 | PAFAH1B1, BIRC5, MAPRE1                                          |

---

**Note:** GO, Gene Ontology.

**Supplemental Table 3** GO functional annotation of molecular function for miR-198 target

genes.

| GO ID      | GO term                          | Count (%) | P value  | Gene symbol                                                     |
|------------|----------------------------------|-----------|----------|-----------------------------------------------------------------|
| GO:0019899 | enzyme binding                   | 21(1.3)   | 1.55E-08 | NLK, BIRC5, SMAD2, HMGA1, SPDYA, HDAC4, PPP1R9B, etc.           |
| GO:0019904 | protein domain specific binding  | 13(0.8)   | 2.54E-05 | PPARA, MTSS1, TLN1, YWHAG, FUT8, VCP, INPPL1, NLK, etc.         |
| GO:0004672 | protein kinase activity          | 16(1.0)   | 1.94E-04 | PAK6, NTRK3, DDR1, POLR2E, ULK1, NLK, MET, NEK8, etc.           |
| GO:0017124 | SH3 domain binding               | 6(0.4)    | 1.38E-03 | MTSS1, FUT8, INPPL1, CBL, ARHGAP1, ADAM12                       |
| GO:0004713 | protein tyrosine kinase activity | 7(0.4)    | 2.99E-03 | NTRK3, DDR1, MET, TNK2, MST1R, MAP2K7, SRC                      |
| GO:0019900 | kinase binding                   | 7(0.4)    | 4.33E-03 | SPDYA, YWHAG, CDKN2B, CCND2, SLC2A1, CD4, MAP2K7                |
| GO:0032403 | protein complex binding          | 7(0.4)    | 6.70E-03 | ULK1, ITGA5, CTGF, SPTBN1, PTPN1, THBS1, FRS2                   |
| GO:0004857 | enzyme inhibitor activity        | 8(0.5)    | 8.43E-03 | PPP1R9B, YWHAG, CDKN2B, SERPINF2, SERPINA5, BIRC5, BCL2L1, TNK2 |
| GO:0019901 | protein kinase binding           | 6(0.4)    | 8.53E-03 | SPDYA, YWHAG, CDKN2B, CCND2, CD4, MAP2K7                        |

**Note:** GO, Gene Ontology.
